# Supplementary material
Source: MDPI journal article supplement (https://www.mdpi.com/2073-4395/11/1/182)
Supplement: s1 [file s1]

## Supplementary tables

**Table S1.** Average monthly air temperatures and monthly total precipitation for the growing season.

| Years | Temperature [°C] |      |      |      |      |      |      | Average |
|-------|------------------|------|------|------|------|------|------|---------|
|       | IV               | V    | VI   | VII  | VIII | IX   | X    |         |
| 2016  | 9.6              | 16.3 | 19.9 | 20.3 | 19.0 | 17.3 | 8.4  | 15.8    |
| 2017  | 7.3              | 13.7 | 17.4 | 18.0 | 18.9 | 13.3 | 10.6 | 14.2    |

  

| Years | Rainfall [mm] |      |       |       |      |      |       | Suma  |
|-------|---------------|------|-------|-------|------|------|-------|-------|
| 2016  | 47.3          | 47.3 | 123.8 | 132.8 | 50.3 | 4.6  | 105.0 | 511.1 |
| 2017  | 40.6          | 56.8 | 58.2  | 168.0 | 82.0 | 45.6 | 91.8  | 553.0 |

**Table S2.** Simple sequence repeat (SSR) markers motifs (<https://www.maizegdb.org/>).

| Primer code | Motif | Primer code | Motif     | Primer code | Motif    |
|-------------|-------|-------------|-----------|-------------|----------|
| phi001      | AG    | phi049      | ACT       | phi079      | AGATG    |
| phi002      | AACG  | phi054      | AG        | phi080      | AGGAG    |
| phi008      | GGC   | phi056      | CCG       | phi085      | AACGC    |
| phi015      | AAAC  | phi061      | TTCT-GTAT | phi112      | AG       |
| phi021      | AG    | phi064      | ATCC      | phi113      | GTCT     |
| phi026      | CT    | phi068      | AT        | phi116      | ACTG/ACG |
| phi036      | AG    | phi070      | AGCTG     | phi119      | AG       |
| phi041      | AGCC  | phi072      | AAAC      | phi120      | AAG      |
| phi042      | CATA  | phi073      | AGC       | phi127      | AGAC     |
| phi047      | ATC   | phi076      | AGCGGG    | phi129      | ATAC     |

**Table S3.** Molecular markers associated with SPAD.

| Year | Marker symbol | Effect | Standard error | <i>p</i> -value | The proportion of total phenotypic variance explained by the marker |
|------|---------------|--------|----------------|-----------------|---------------------------------------------------------------------|
| 2016 | phi127/3      | 71.4   | 31.6           | 0.045           | 25.5                                                                |
|      | phi083/2      | 71.4   | 31.6           | 0.045           | 25.5                                                                |
|      | phi054/3      | 71.4   | 31.6           | 0.045           | 25.5                                                                |
|      | phi068/1      | -52.9  | 23.3           | 0.044           | 25.7                                                                |
|      | phi058/1      | 71.4   | 31.6           | 0.045           | 25.5                                                                |
|      | phi056/2      | 56.9   | 22.4           | 0.028           | 31.2                                                                |
|      | phi080/2      | 40.9   | 16.3           | 0.029           | 30.7                                                                |
|      | phi116/4      | -51.6  | 18.5           | 0.018           | 36.1                                                                |
| 2017 | phi072/1      | 51.9   | 22.9           | 0.044           | 25.7                                                                |

**Table S4.** Molecular markers associated with the number of plant after germination.

| Year | Marker symbol               | Effect       | Standard error | <i>p</i> -value | The proportion of total phenotypic variance explained by the marker |
|------|-----------------------------|--------------|----------------|-----------------|---------------------------------------------------------------------|
| 2016 | phi079/3                    | -0.170       | 0.074          | 0.043           | 26.1                                                                |
|      | phi026/4                    | 0.371        | 0.127          | 0.014           | 38.8                                                                |
|      | phi068/3                    | -0.291       | 0.089          | 0.007           | 44.7                                                                |
|      | phi073/1                    | 0.371        | 0.127          | 0.014           | 38.8                                                                |
|      | phi021/3                    | -0.371       | 0.127          | 0.014           | 38.8                                                                |
|      | <b>phi036/3<sup>#</sup></b> | <b>0.394</b> | <b>0.120</b>   | <b>0.007</b>    | <b>44.8</b>                                                         |
|      | phi056/2                    | 0.371        | 0.127          | 0.014           | 38.8                                                                |
|      | phi120/1                    | 0.371        | 0.127          | 0.014           | 38.8                                                                |
| 2017 | phi127/2                    | 0.808        | 0.311          | 0.025           | 32.4                                                                |
|      | phi085/3                    | -1.453       | 0.595          | 0.033           | 29.3                                                                |
|      | phi047/4                    | 0.853        | 0.300          | 0.016           | 37.2                                                                |
|      | phi076/2                    | -1.604       | 0.252          | <.001           | 76.7                                                                |
|      | <b>phi036/3</b>             | <b>1.488</b> | <b>0.587</b>   | <b>0.028</b>    | <b>31.2</b>                                                         |
|      | phi080/4                    | 1.300        | 0.254          | <.001           | 67.8                                                                |

<sup>#</sup> - SSR markers with significant effect in both years of experiment were marked by bold

**Table S5.** Molecular markers associated with the number of plants before harvest.

| Year | Marker symbol               | Effect       | Standard error | <i>p</i> -value | The proportion of total phenotypic variance explained by the marker |
|------|-----------------------------|--------------|----------------|-----------------|---------------------------------------------------------------------|
| 2016 | phi079/3                    | -0.209       | 0.054          | 0.003           | 53.6                                                                |
|      | phi068/3                    | -0.242       | 0.089          | 0.020           | 35.0                                                                |
|      | phi042/3                    | -0.261       | 0.083          | 0.009           | 42.4                                                                |
|      | <b>phi036/3<sup>#</sup></b> | <b>0.363</b> | <b>0.110</b>   | <b>0.007</b>    | <b>45.1</b>                                                         |
|      | phi064/3                    | -0.170       | 0.074          | 0.042           | 26.4                                                                |
| 2017 | phi127/2                    | 0.792        | 0.304          | 0.024           | 32.5                                                                |
|      | phi085/3                    | -1.423       | 0.582          | 0.032           | 29.4                                                                |
|      | phi047/4                    | 0.822        | 0.296          | 0.018           | 35.8                                                                |
|      | phi076/2                    | -1.581       | 0.240          | <.001           | 77.9                                                                |
|      | <b>phi036/3</b>             | <b>1.476</b> | <b>0.570</b>   | <b>0.025</b>    | <b>32.3</b>                                                         |
|      | phi080/4                    | 1.279        | 0.246          | <.001           | 68.5                                                                |

<sup>#</sup> - SSR markers with significant effect in both years of experiment were marked by bold

**Table S6.** Molecular markers associated with moisture of grain.

| Year | Marker symbol               | Effect        | Standard error | <i>p</i> -value | The proportion of total phenotypic variance explained by the marker |
|------|-----------------------------|---------------|----------------|-----------------|---------------------------------------------------------------------|
| 2016 | phi046/4                    | 1.684         | 0.576          | 0.014           | 38.6                                                                |
|      | phi068/1                    | -2.610        | 0.711          | 0.004           | 51.0                                                                |
|      | <b>phi073/5<sup>#</sup></b> | <b>-2.052</b> | <b>0.665</b>   | <b>0.010</b>    | <b>41.5</b>                                                         |
|      | <b>phi061/2</b>             | <b>1.993</b>  | <b>0.874</b>   | <b>0.044</b>    | <b>25.9</b>                                                         |
| 2017 | <b>phi073/5</b>             | <b>-1.399</b> | <b>0.595</b>   | <b>0.038</b>    | <b>27.4</b>                                                         |
|      | <b>phi061/2</b>             | <b>1.676</b>  | <b>0.686</b>   | <b>0.033</b>    | <b>29.3</b>                                                         |
|      | phi120/2                    | -1.361        | 0.603          | 0.045           | 25.4                                                                |

# - SSR markers with significant effect in both years of experiment were marked by bold

**Table S7.** Molecular markers associated with yield of grain.

| Year | Marker symbol               | Effect       | Standard error | <i>p</i> -value | The proportion of total phenotypic variance explained by the marker |
|------|-----------------------------|--------------|----------------|-----------------|---------------------------------------------------------------------|
| 2016 | phi079/2                    | -15.87       | 7.18           | 0.049           | 24.4                                                                |
|      | <b>phi047/4<sup>#</sup></b> | <b>16.97</b> | <b>6.95</b>    | <b>0.033</b>    | <b>29.2</b>                                                         |
|      | phi001/4                    | 19.99        | 6.47           | 0.010           | 41.6                                                                |
|      | phi002/2                    | 20.19        | 8.20           | 0.032           | 29.6                                                                |
|      | phi068/1                    | -27.29       | 8.64           | 0.009           | 42.8                                                                |
|      | phi073/2                    | -18.25       | 7.53           | 0.034           | 28.9                                                                |
|      | phi021/4                    | -23.74       | 9.54           | 0.030           | 30.2                                                                |
|      | phi041/1                    | 17.78        | 7.63           | 0.040           | 27.0                                                                |
|      | phi056/3                    | -24.04       | 9.47           | 0.028           | 31.2                                                                |
|      | phi120/3                    | 17.78        | 7.63           | 0.040           | 27.0                                                                |
| 2017 | phi054/1                    | 15.19        | 6.5            | 0.039           | 27.1                                                                |
|      | <b>phi047/4</b>             | <b>9.00</b>  | <b>3.27</b>    | <b>0.019</b>    | <b>35.3</b>                                                         |
|      | phi064/4                    | 15.19        | 6.50           | 0.039           | 27.1                                                                |

# - SSR markers with significant effect in both years of experiment were marked by bold

**Table S8.** Molecular markers associated with weight of 1000 grains.

| Year | Marker symbol               | Effect       | Standard error | <i>p</i> -value | The proportion of total phenotypic variance explained by the marker |
|------|-----------------------------|--------------|----------------|-----------------|---------------------------------------------------------------------|
| 2016 | <b>phi127/3<sup>#</sup></b> | <b>-60.7</b> | <b>19.0</b>    | <b>0.008</b>    | <b>43.5</b>                                                         |
|      | <b>phi083/2</b>             | <b>-60.7</b> | <b>19.0</b>    | <b>0.008</b>    | <b>43.5</b>                                                         |
|      | <b>phi054/3</b>             | <b>-60.7</b> | <b>19.0</b>    | <b>0.008</b>    | <b>43.5</b>                                                         |
|      | phi001/4                    | -27.4        | 11.8           | 0.041           | 26.6                                                                |
|      | <b>phi058/1</b>             | <b>-60.7</b> | <b>19.0</b>    | <b>0.008</b>    | <b>43.5</b>                                                         |
|      | phi056/2                    | -42.2        | 14.8           | 0.015           | 37.4                                                                |
| 2017 | <b>phi127/3</b>             | <b>-66.2</b> | <b>22.8</b>    | <b>0.014</b>    | <b>38.3</b>                                                         |
|      | <b>phi083/2</b>             | <b>-66.2</b> | <b>22.8</b>    | <b>0.014</b>    | <b>38.3</b>                                                         |
|      | <b>phi054/3</b>             | <b>-66.2</b> | <b>22.8</b>    | <b>0.014</b>    | <b>38.3</b>                                                         |
|      | phi068/4                    | -50.8        | 16.3           | 0.010           | 42.0                                                                |
|      | <b>phi058/1</b>             | <b>-66.2</b> | <b>22.8</b>    | <b>0.014</b>    | <b>38.3</b>                                                         |

# - SSR markers with significant effect in both years of experiment were marked by bold

**Table S9.** Molecular markers associated with length of ears.

| Year | Marker symbol               | Effect        | Standard error | <i>p</i> -value | The proportion of total phenotypic variance explained by the marker |
|------|-----------------------------|---------------|----------------|-----------------|---------------------------------------------------------------------|
| 2016 | phi046/4                    | -0.662        | 0.276          | 0.035           | 28.4                                                                |
|      | <b>phi061/2<sup>#</sup></b> | <b>-1.150</b> | <b>0.318</b>   | <b>0.004</b>    | <b>50.2</b>                                                         |
|      | <b>phi061/5</b>             | <b>-0.866</b> | <b>0.306</b>   | <b>0.016</b>    | <b>36.8</b>                                                         |
| 2017 | phi076/2                    | 1.770         | 0.677          | 0.024           | 32.7                                                                |
|      | <b>phi061/2</b>             | <b>-1.722</b> | <b>0.689</b>   | <b>0.029</b>    | <b>30.5</b>                                                         |
|      | <b>phi061/5</b>             | <b>-1.424</b> | <b>0.601</b>   | <b>0.037</b>    | <b>27.8</b>                                                         |

# - SSR markers with significant effect in both years of experiment were marked by bold

**Table S10.** Molecular markers associated with diameter of ears.

| Year | Marker symbol               | Effect       | Standard error | <i>p</i> -value | The proportion of total phenotypic variance explained by the marker |
|------|-----------------------------|--------------|----------------|-----------------|---------------------------------------------------------------------|
| 2016 | <b>phi070/2<sup>#</sup></b> | <b>0.349</b> | <b>0.123</b>   | <b>0.016</b>    | <b>37.1</b>                                                         |
|      | phi083/3                    | 0.441        | 0.174          | 0.028           | 31.0                                                                |
|      | phi047/4                    | 0.217        | 0.097          | 0.048           | 24.8                                                                |
|      | phi046/4                    | 0.224        | 0.096          | 0.039           | 27.1                                                                |
|      | phi072/4                    | 0.441        | 0.174          | 0.028           | 31.0                                                                |
|      | <b>phi076/3</b>             | <b>0.327</b> | <b>0.080</b>   | <b>0.002</b>    | <b>57.0</b>                                                         |
|      | phi036/2                    | 0.441        | 0.174          | 0.028           | 31.0                                                                |
|      | phi036/4                    | 0.252        | 0.093          | 0.020           | 34.6                                                                |
|      | <b>phi041/1</b>             | <b>0.336</b> | <b>0.076</b>   | <b>0.001</b>    | <b>60.7</b>                                                         |
|      | phi061/4                    | 0.441        | 0.174          | 0.028           | 31.0                                                                |
|      | <b>phi120/3</b>             | <b>0.336</b> | <b>0.076</b>   | <b>0.001</b>    | <b>60.7</b>                                                         |
| 2017 | <b>phi070/2</b>             | <b>0.210</b> | <b>0.093</b>   | <b>0.046</b>    | <b>25.3</b>                                                         |
|      | phi068/3                    | 0.238        | 0.087          | 0.019           | 35.2                                                                |
|      | <b>phi076/3</b>             | <b>0.190</b> | <b>0.067</b>   | <b>0.016</b>    | <b>36.9</b>                                                         |
|      | <b>phi041/1</b>             | <b>0.207</b> | <b>0.062</b>   | <b>0.007</b>    | <b>45.6</b>                                                         |
|      | <b>phi120/3</b>             | <b>0.207</b> | <b>0.062</b>   | <b>0.007</b>    | <b>45.6</b>                                                         |

# - SSR markers with significant effect in both years of experiment were marked by bold

**Table S11.** Molecular markers associated with the number of rows in ear.

| Year | Marker symbol | Effect | Standard error | <i>p</i> -value | The proportion of total phenotypic variance explained by the marker |
|------|---------------|--------|----------------|-----------------|---------------------------------------------------------------------|
| 2016 | phi079/3      | 1.307  | 0.470          | 0.018           | 35.9                                                                |
|      | phi068/2      | -1.217 | 0.552          | 0.050           | 24.4                                                                |
|      | phi068/3      | 2.018  | 0.590          | 0.006           | 47.1                                                                |
|      | phi064/3      | 1.235  | 0.548          | 0.046           | 25.4                                                                |
| 2017 | phi083/4      | -1.213 | 0.391          | 0.010           | 41.8                                                                |
|      | phi068/4      | 1.355  | 0.595          | 0.044           | 25.9                                                                |
|      | phi056/1      | 1.099  | 0.420          | 0.024           | 32.7                                                                |

**Table S12.** Molecular markers associated with the number of kernels in row.

| Year | Marker symbol               | Effect        | Standard error | <i>p</i> -value | The proportion of total phenotypic variance explained by the marker |
|------|-----------------------------|---------------|----------------|-----------------|---------------------------------------------------------------------|
| 2016 | <b>phi021/4<sup>#</sup></b> | <b>-2.750</b> | <b>1.080</b>   | <b>0.027</b>    | <b>31.6</b>                                                         |
|      | phi042/2                    | -2.458        | 0.902          | 0.020           | 34.8                                                                |
| 2017 | <b>phi021/4</b>             | <b>-2.570</b> | <b>1.120</b>   | <b>0.043</b>    | <b>26.0</b>                                                         |
|      | phi061/5                    | -2.163        | 0.969          | 0.047           | 24.9                                                                |

# - SSR markers with significant effect in both years of experiment were marked by bold

**Table S13.** Molecular markers associated with the number of grains in ear.

| Year | Marker symbol               | Effect       | Standard error | <i>p</i> -value | The proportion of total phenotypic variance explained by the marker |
|------|-----------------------------|--------------|----------------|-----------------|---------------------------------------------------------------------|
|      | phi079/3                    | 66.1         | 19.9           | 0.007           | 45.6                                                                |
|      | phi047/4                    | 58.1         | 22.0           | 0.023           | 33.2                                                                |
| 2016 | <b>phi021/4<sup>#</sup></b> | <b>-86.4</b> | <b>28.9</b>    | <b>0.012</b>    | <b>39.8</b>                                                         |
|      | phi056/3                    | -74.7        | 31.7           | 0.038           | 27.5                                                                |
|      | phi064/3                    | 65.8         | 23.0           | 0.016           | 37.3                                                                |
| 2017 | <b>phi021/4</b>             | <b>-66.3</b> | <b>29.7</b>    | <b>0.048</b>    | <b>24.9</b>                                                         |

# - SSR markers with significant effect in both years of experiment were marked by bold

**Table S14.** Molecular markers associated with leaf weight.

| Year | Marker symbol               | Effect      | Standard error | <i>p</i> -value | The proportion of total phenotypic variance explained by the marker |
|------|-----------------------------|-------------|----------------|-----------------|---------------------------------------------------------------------|
|      | phi127/4                    | 24.8        | 9.2            | 0.021           | 34.4                                                                |
| 2016 | <b>phi001/3<sup>#</sup></b> | <b>24.6</b> | <b>10.0</b>    | <b>0.032</b>    | <b>29.5</b>                                                         |
|      | phi042/1                    | -44.8       | 16.9           | 0.022           | 33.6                                                                |
|      | phi116/3                    | 31.2        | 12.9           | 0.034           | 28.9                                                                |
| 2017 | <b>phi001/3</b>             | <b>19.4</b> | <b>8.7</b>     | <b>0.047</b>    | <b>25.1</b>                                                         |
|      | phi068/3                    | -25.1       | 11.0           | 0.044           | 25.9                                                                |

# - SSR markers with significant effect in both years of experiment were marked by bold

**Table S15.** Molecular markers associated with stems weight.

| Year | Marker symbol | Effect | Standard error | <i>p</i> -value | The proportion of total phenotypic variance explained by the marker |
|------|---------------|--------|----------------|-----------------|---------------------------------------------------------------------|
|      | phi127/2      | 48.0   | 18.8           | 0.027           | 31.6                                                                |
|      | phi079/3      | 47.5   | 18.9           | 0.029           | 30.8                                                                |
|      | phi047/4      | 60.3   | 15.2           | 0.002           | 55.3                                                                |
|      | phi072/2      | 68.9   | 25.3           | 0.020           | 34.9                                                                |
| 2016 | phi073/3      | 65.9   | 16.1           | 0.002           | 56.6                                                                |
|      | phi076/3      | 56.1   | 19.2           | 0.014           | 38.6                                                                |
|      | phi036/4      | 64.1   | 14.7           | 0.001           | 60.1                                                                |
|      | phi080/2      | 52.6   | 17.6           | 0.012           | 39.9                                                                |
|      | phi080/4      | 52.7   | 23.1           | 0.043           | 26.0                                                                |
|      | phi116/2      | 50.0   | 19.0           | 0.024           | 33.0                                                                |
| 2017 | phi068/4      | -79.7  | 35.0           | 0.044           | 25.9                                                                |
|      | phi021/1      | 65.1   | 26.7           | 0.033           | 29.1                                                                |

**Table S16.** Molecular markers associated with ears weight.

| Year | Marker symbol | Effect | Standard error | <i>p</i> -value | The proportion of total phenotypic variance explained by the marker |
|------|---------------|--------|----------------|-----------------|---------------------------------------------------------------------|
| 2016 | phi042/2      | -29.0  | 8.3            | 0.005           | 48.5                                                                |
|      | phi127/2      | -45.9  | 15.5           | 0.013           | 39.3                                                                |
|      | phi070/1      | -49.2  | 14.5           | 0.006           | 46.6                                                                |
|      | phi079/4      | -56.9  | 23.0           | 0.031           | 29.8                                                                |
|      | phi002/1      | -56.9  | 23.0           | 0.031           | 29.8                                                                |
|      | phi002/2      | -46.7  | 20.2           | 0.041           | 26.6                                                                |
| 2017 | phi073/3      | -43.4  | 18.2           | 0.037           | 28.0                                                                |
|      | phi042/1      | -77.4  | 31.1           | 0.030           | 30.2                                                                |
|      | phi076/1      | -46.0  | 20.3           | 0.045           | 25.5                                                                |
|      | phi036/4      | -40.9  | 17.4           | 0.038           | 27.6                                                                |
|      | phi041/2      | -56.9  | 23.0           | 0.031           | 29.8                                                                |
|      | phi061/3      | -56.7  | 17.7           | 0.008           | 43.6                                                                |

**Table S17.** Molecular markers associated with fresh weight of one plant.

| Year | Marker symbol | Effect | Standard error | <i>p</i> -value | The proportion of total phenotypic variance explained by the marker |
|------|---------------|--------|----------------|-----------------|---------------------------------------------------------------------|
| 2016 | phi047/4      | 69.9   | 21.7           | 0.008           | 43.9                                                                |
| 2017 | phi008/3      | 91.5   | 31.8           | 0.015           | 37.8                                                                |

**Table S18.** Molecular markers associated with share of leaves in the mass of the plant.

| Year | Marker symbol | Effect | Standard error | <i>p</i> -value | The proportion of total phenotypic variance explained by the marker |
|------|---------------|--------|----------------|-----------------|---------------------------------------------------------------------|
| 2016 | phi127/4      | 2.557  | 0.935          | 0.019           | 35.0                                                                |
|      | phi083/4      | 2.375  | 0.978          | 0.033           | 29.0                                                                |
|      | phi042/1      | -4.950 | 1.630          | 0.011           | 40.6                                                                |
|      | phi041/3      | 2.380  | 1.060          | 0.046           | 25.3                                                                |
|      | phi116/1      | 2.379  | 0.977          | 0.033           | 29.1                                                                |
|      | phi049/4      | 1.976  | 0.731          | 0.021           | 34.5                                                                |
| 2017 | phi127/2      | 1.691  | 0.766          | 0.049           | 24.4                                                                |
|      | phi001/3      | 1.836  | 0.825          | 0.048           | 24.8                                                                |
|      | phi068/3      | -2.941 | 0.911          | 0.008           | 44.0                                                                |
|      | phi076/2      | -3.036 | 0.882          | 0.006           | 47.5                                                                |
|      | phi036/3      | 3.820  | 1.280          | 0.012           | 39.7                                                                |
|      | phi080/4      | 2.497  | 0.786          | 0.009           | 43.1                                                                |

**Table S19.** Molecular markers associated with damage of maize caused by *P. nubilalis*.

| Year | Marker symbol | Effect | Standard error | <i>p</i> -value | The proportion of total phenotypic variance explained by the marker |
|------|---------------|--------|----------------|-----------------|---------------------------------------------------------------------|
| 2016 | phi083/4      | -2.595 | 0.654          | 0.002           | 55.1                                                                |
|      | phi079/2      | -1.961 | 0.801          | 0.032           | 29.4                                                                |
|      | phi047/4      | 1.938  | 0.806          | 0.035           | 28.5                                                                |
|      | phi001/2      | 2.425  | 0.923          | 0.024           | 33.0                                                                |
|      | phi001/4      | 2.547  | 0.671          | 0.003           | 52.8                                                                |
|      | phi026/3      | -2.111 | 0.797          | 0.023           | 33.4                                                                |
|      | phi036/4      | 2.015  | 0.819          | 0.032           | 29.6                                                                |
|      | phi041/1      | 1.997  | 0.891          | 0.046           | 25.1                                                                |
|      | phi041/3      | -2.733 | 0.69           | 0.002           | 55.0                                                                |
|      | phi056/1      | 2.568  | 0.664          | 0.003           | 53.8                                                                |
|      | phi116/1      | -2.191 | 0.777          | 0.017           | 36.7                                                                |
|      | phi116/4      | -2.454 | 0.916          | 0.021           | 34.0                                                                |
|      | phi119/4      | 2.884  | 0.632          | <.001           | 62.3                                                                |
|      | phi120/3      | 1.997  | 0.891          | 0.046           | 25.1                                                                |
| 2017 | phi073/2      | 1.603  | 0.724          | 0.049           | 24.5                                                                |
|      | phi061/3      | -1.966 | 0.747          | 0.023           | 33.0                                                                |
|      | phi116/2      | -2.062 | 0.544          | 0.003           | 52.7                                                                |
|      | phi119/3      | -1.686 | 0.707          | 0.036           | 28.1                                                                |

**Table S20.** Molecular markers associated with infection of maize by *Fusarium* spp.

| Year | Marker symbol | Effect | Standard error | <i>p</i> -value | The proportion of total phenotypic variance explained by the marker |
|------|---------------|--------|----------------|-----------------|---------------------------------------------------------------------|
| 2016 | phi070/2      | 1.058  | 0.260          | 0.002           | 56.4                                                                |
|      | phi083/3      | 1.648  | 0.252          | <.001           | 77.7                                                                |
|      | phi001/2      | 0.724  | 0.277          | 0.024           | 32.7                                                                |
|      | phi002/2      | 0.726  | 0.276          | 0.023           | 33.0                                                                |
|      | phi072/4      | 1.648  | 0.252          | <.001           | 77.7                                                                |
|      | phi076/3      | 0.629  | 0.260          | 0.034           | 28.8                                                                |
|      | phi036/2      | 1.648  | 0.252          | <.001           | 77.7                                                                |
|      | phi041/1      | 0.629  | 0.260          | 0.034           | 28.8                                                                |
|      | phi061/4      | 1.648  | 0.252          | <.001           | 77.7                                                                |
|      | phi120/3      | 0.629  | 0.260          | 0.034           | 28.8                                                                |
| 2017 | phi068/2      | -3.020 | 1.170          | 0.025           | 32.3                                                                |
|      | phi021/1      | -3.020 | 1.170          | 0.025           | 32.3                                                                |
|      | phi061/3      | -3.100 | 1.330          | 0.039           | 27.1                                                                |
|      | phi116/1      | 2.840  | 1.110          | 0.027           | 31.4                                                                |



**Table S21.** Molecular markers associated with infection of maize by *Ustilago maydis* Corda.

| Year | Marker symbol | Effect | Standard error | <i>p</i> -value | The proportion of total phenotypic variance explained by the marker |
|------|---------------|--------|----------------|-----------------|---------------------------------------------------------------------|
| 2016 | phi049/4      | -1.327 | 0.592          | 0.046           | 25.2                                                                |
|      | phi070/2      | 1.885  | 0.778          | 0.034           | 28.9                                                                |
|      | phi083/3      | 3.491  | 0.770          | <.001           | 62.0                                                                |
|      | phi079/3      | 1.347  | 0.567          | 0.037           | 27.9                                                                |
|      | phi068/3      | 1.992  | 0.753          | 0.023           | 33.3                                                                |
|      | phi072/4      | 3.491  | 0.770          | <.001           | 62.0                                                                |
|      | phi073/3      | 1.813  | 0.518          | 0.005           | 48.4                                                                |
|      | phi076/3      | 1.801  | 0.522          | 0.005           | 47.7                                                                |
|      | phi036/2      | 3.491  | 0.770          | <.001           | 62.0                                                                |
|      | phi036/4      | 1.621  | 0.521          | 0.010           | 42.0                                                                |
|      | phi061/4      | 3.491  | 0.770          | <.001           | 62.0                                                                |
|      | phi120/2      | 1.789  | 0.624          | 0.015           | 37.5                                                                |
| 2017 | phi127/1      | 11.220 | 1.820          | <.001           | 75.4                                                                |
|      | phi054/2      | 11.220 | 1.820          | <.001           | 75.4                                                                |
|      | phi054/5      | 11.220 | 1.820          | <.001           | 75.4                                                                |
|      | phi079/4      | 5.780  | 2.240          | 0.026           | 32.0                                                                |
|      | phi002/1      | 5.780  | 2.240          | 0.026           | 32.0                                                                |
|      | phi041/2      | 5.780  | 2.240          | 0.026           | 32.0                                                                |
|      | phi061/3      | 5.020  | 1.900          | 0.023           | 33.3                                                                |

**Table S22.** Molecular markers associated with the number of ears.

| Year | Marker symbol               | Effect        | Standard error | <i>p</i> -value | The proportion of total phenotypic variance explained by the marker |
|------|-----------------------------|---------------|----------------|-----------------|---------------------------------------------------------------------|
| 2016 | phi083/1                    | 1.386         | 0.587          | 0.038           | 27.6                                                                |
|      | phi079/2                    | -0.990        | 0.243          | 0.002           | 56.5                                                                |
|      | phi001/4                    | 0.732         | 0.327          | 0.047           | 25.1                                                                |
|      | phi026/3                    | -0.802        | 0.312          | 0.026           | 31.8                                                                |
|      | phi068/1                    | -1.059        | 0.426          | 0.030           | 30.2                                                                |
|      | phi073/2                    | -0.795        | 0.340          | 0.039           | 27.1                                                                |
|      | phi073/3                    | 0.780         | 0.343          | 0.044           | 25.8                                                                |
|      | <b>phi076/2<sup>#</sup></b> | <b>-1.011</b> | <b>0.436</b>   | <b>0.041</b>    | <b>26.7</b>                                                         |
|      | <b>phi036/3</b>             | <b>1.38</b>   | <b>0.588</b>   | <b>0.039</b>    | <b>27.3</b>                                                         |
|      | phi041/3                    | -0.786        | 0.342          | 0.042           | 26.3                                                                |
|      | phi056/1                    | 0.791         | 0.314          | 0.029           | 30.7                                                                |
|      | <b>phi116/2</b>             | <b>0.896</b>  | <b>0.288</b>   | <b>0.010</b>    | <b>42.1</b>                                                         |
| 2017 | phi127/2                    | 0.680         | 0.292          | 0.040           | 26.9                                                                |
|      | phi047/4                    | 0.768         | 0.271          | 0.016           | 36.9                                                                |
|      | <b>phi076/2</b>             | <b>-1.345</b> | <b>0.280</b>   | <b>&lt;.001</b> | <b>64.8</b>                                                         |
|      | <b>phi036/3</b>             | <b>1.388</b>  | <b>0.520</b>   | <b>0.022</b>    | <b>33.8</b>                                                         |
|      | phi080/4                    | 1.179         | 0.227          | <.001           | 68.3                                                                |
|      | <b>phi116/2</b>             | <b>0.788</b>  | <b>0.278</b>   | <b>0.016</b>    | <b>37.1</b>                                                         |

<sup>#</sup> - SSR markers with significant effect in both years of experiment were marked by bold

**Table S23.** Molecular markers associated with plant density.

| Year | Marker symbol | Effect | Standard error | <i>p</i> -value | The proportion of total phenotypic variance explained by the marker |
|------|---------------|--------|----------------|-----------------|---------------------------------------------------------------------|
| 2016 | phi079/2      | -0.957 | 0.419          | 0.043           | 26.0                                                                |
|      | phi026/1      | -1.562 | 0.522          | 0.012           | 39.8                                                                |
|      | phi026/4      | 2.060  | 0.722          | 0.016           | 37.3                                                                |
|      | phi068/4      | 1.577  | 0.518          | 0.011           | 40.8                                                                |
|      | phi058/3      | 1.283  | 0.462          | 0.018           | 35.9                                                                |
|      | phi073/1      | 2.060  | 0.722          | 0.016           | 37.3                                                                |
|      | phi021/3      | -2.060 | 0.722          | 0.016           | 37.3                                                                |
|      | phi056/1      | 1.278  | 0.352          | 0.004           | 50.4                                                                |
|      | phi056/2      | 2.060  | 0.722          | 0.016           | 37.3                                                                |
|      | phi120/1      | 2.060  | 0.722          | 0.016           | 37.3                                                                |
| 2017 | phi047/4      | 0.368  | 0.122          | 0.012           | 40.5                                                                |
|      | phi002/3      | 0.694  | 0.226          | 0.011           | 41.2                                                                |
|      | phi058/2      | 0.694  | 0.226          | 0.011           | 41.2                                                                |
|      | phi072/3      | 0.694  | 0.226          | 0.011           | 41.2                                                                |
|      | phi073/4      | 0.694  | 0.226          | 0.011           | 41.2                                                                |
|      | phi036/1      | 0.694  | 0.226          | 0.011           | 41.2                                                                |
|      | phi061/1      | 0.411  | 0.151          | 0.020           | 35.0                                                                |
|      | phi064/3      | 0.349  | 0.144          | 0.033           | 29.0                                                                |
|      | phi119/1      | 0.446  | 0.141          | 0.009           | 42.7                                                                |
|      | phi119/4      | 0.366  | 0.140          | 0.024           | 32.7                                                                |

**Table S24.** Molecular markers associated with content of chlorophyll *a*.

| Year | Marker symbol | Effect | Standard error | <i>p</i> -value | The proportion of total phenotypic variance explained by the marker |
|------|---------------|--------|----------------|-----------------|---------------------------------------------------------------------|
| 2016 | phi042/1      | -0.724 | 0.175          | 0.002           | 57.4                                                                |
|      | phi076/1      | -0.482 | 0.101          | <.001           | 64.7                                                                |
|      | phi080/1      | -0.368 | 0.117          | 0.009           | 42.5                                                                |
| 2017 | phi001/4      | 0.249  | 0.100          | 0.030           | 30.1                                                                |
|      | phi002/2      | 0.303  | 0.112          | 0.021           | 34.3                                                                |
|      | phi073/2      | -0.277 | 0.102          | 0.021           | 34.5                                                                |
|      | phi041/1      | 0.264  | 0.105          | 0.029           | 30.5                                                                |
|      | phi120/3      | 0.264  | 0.105          | 0.029           | 30.5                                                                |

**Table S25.** Molecular markers associated with content of chlorophyll *b*.

| Year | Marker symbol | Effect | Standard error | <i>p</i> -value | The proportion of total phenotypic variance explained by the marker |
|------|---------------|--------|----------------|-----------------|---------------------------------------------------------------------|
| 2016 | phi042/1      | -0.213 | 0.048          | <.001           | 61.1                                                                |
|      | phi076/1      | -0.139 | 0.028          | <.001           | 66.2                                                                |
|      | phi080/1      | -0.103 | 0.034          | 0.012           | 40.1                                                                |
| 2017 | phi054/1      | -0.111 | 0.048          | 0.041           | 26.6                                                                |
|      | phi073/2      | -0.065 | 0.027          | 0.036           | 28.3                                                                |
|      | phi064/4      | -0.111 | 0.048          | 0.041           | 26.6                                                                |
|      | phi116/2      | 0.060  | 0.026          | 0.044           | 25.7                                                                |
|      | phi119/3      | 0.072  | 0.026          | 0.018           | 35.7                                                                |

**Table S26.** Molecular markers associated with content of chlorophyll *a+b*.

| Year | Marker symbol | Effect | Standard error | <i>p</i> -value | The proportion of total phenotypic variance explained by the marker |
|------|---------------|--------|----------------|-----------------|---------------------------------------------------------------------|
| 2016 | phi042/1      | -0.938 | 0.222          | 0.001           | 58.4                                                                |
|      | phi076/1      | -0.623 | 0.129          | <.001           | 65.1                                                                |
|      | phi080/1      | -0.472 | 0.151          | 0.010           | 42.0                                                                |
| 2017 | phi054/1      | -0.525 | 0.236          | 0.048           | 24.7                                                                |
|      | phi001/4      | 0.303  | 0.126          | 0.035           | 28.5                                                                |
|      | phi002/2      | 0.362  | 0.143          | 0.028           | 31.0                                                                |
|      | phi073/2      | -0.343 | 0.128          | 0.021           | 34.1                                                                |
|      | phi041/1      | 0.325  | 0.132          | 0.031           | 29.7                                                                |
|      | phi064/4      | -0.525 | 0.236          | 0.048           | 24.7                                                                |
|      | phi120/3      | 0.325  | 0.132          | 0.031           | 29.7                                                                |

**Table S27.** Molecular markers associated with content of chlorophyll *a/b*.

| Year | Marker symbol | Effect | Standard error | <i>p</i> -value | The proportion of total phenotypic variance explained by the marker |
|------|---------------|--------|----------------|-----------------|---------------------------------------------------------------------|
| 2016 | phi042/1      | 0.396  | 0.120          | 0.007           | 45.3                                                                |
|      | phi076/1      | 0.279  | 0.066          | 0.001           | 58.5                                                                |
| 2017 | phi068/3      | 0.364  | 0.165          | 0.050           | 24.3                                                                |
|      | phi036/3      | -0.563 | 0.208          | 0.020           | 34.6                                                                |
|      | phi119/3      | -0.361 | 0.110          | 0.007           | 44.7                                                                |

**Table S28.** Molecular markers associated with carotenoids content.

| Year     | Marker symbol               | Effect        | Standard error | <i>p</i> -value | The proportion of total phenotypic variance explained by the marker |
|----------|-----------------------------|---------------|----------------|-----------------|---------------------------------------------------------------------|
| 2016     | phi046/4                    | -1.176        | 0.464          | 0.028           | 31.1                                                                |
|          | <b>phi073/2<sup>#</sup></b> | <b>-1.188</b> | <b>0.519</b>   | <b>0.043</b>    | <b>26.1</b>                                                         |
|          | phi042/1                    | -2.822        | 0.686          | 0.002           | 57.0                                                                |
|          | phi076/1                    | -1.509        | 0.520          | 0.014           | 38.2                                                                |
|          | phi064/3                    | -1.368        | 0.478          | 0.015           | 37.5                                                                |
| 2017     | phi127/1                    | 2.007         | 0.614          | 0.007           | 44.7                                                                |
|          | phi054/2                    | 2.007         | 0.614          | 0.007           | 44.7                                                                |
|          | phi054/5                    | 2.007         | 0.614          | 0.007           | 44.7                                                                |
|          | phi001/4                    | 1.004         | 0.362          | 0.018           | 35.8                                                                |
|          | phi002/2                    | 1.154         | 0.420          | 0.019           | 35.4                                                                |
|          | <b>phi073/2</b>             | <b>-0.915</b> | <b>0.414</b>   | <b>0.049</b>    | <b>24.5</b>                                                         |
|          | phi073/3                    | 1.044         | 0.386          | 0.020           | 34.5                                                                |
|          | phi076/3                    | 0.949         | 0.407          | 0.040           | 27.0                                                                |
|          | phi041/1                    | 1.149         | 0.357          | 0.008           | 43.8                                                                |
|          | phi116/2                    | 1.015         | 0.359          | 0.017           | 36.8                                                                |
|          | phi119/3                    | 1.008         | 0.394          | 0.027           | 31.5                                                                |
| phi120/3 | 1.149                       | 0.357         | 0.008          | 43.8            |                                                                     |

<sup>#</sup> - SSR markers with significant effect in both years of experiment were marked by bold
